# Supplementary material for: Analysis of breast milk fatty acid composition using dried milk samples
Source: Springer Nature journal article supplement (doi:10.1186/s13006-016-0060-2), 2016-01-25
Supplement: MOESM1 [file 9772586]

Fatty Acids <3%

Fatty Acids >3%

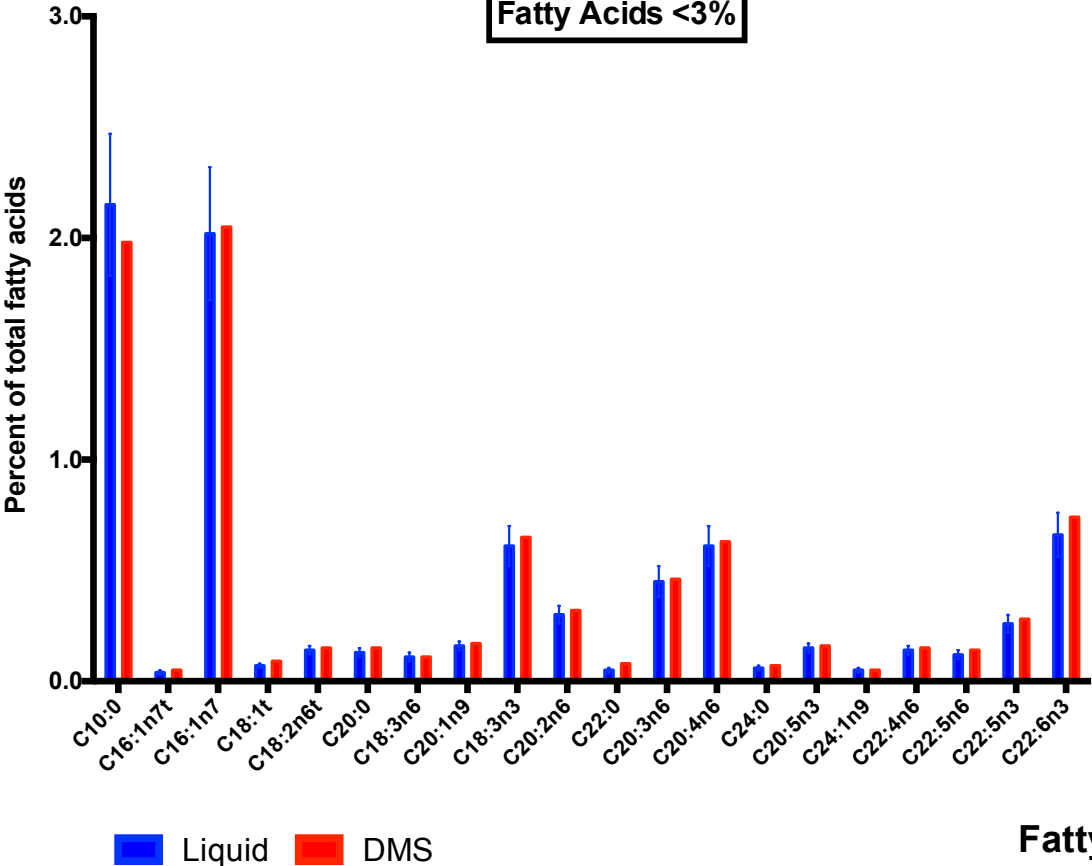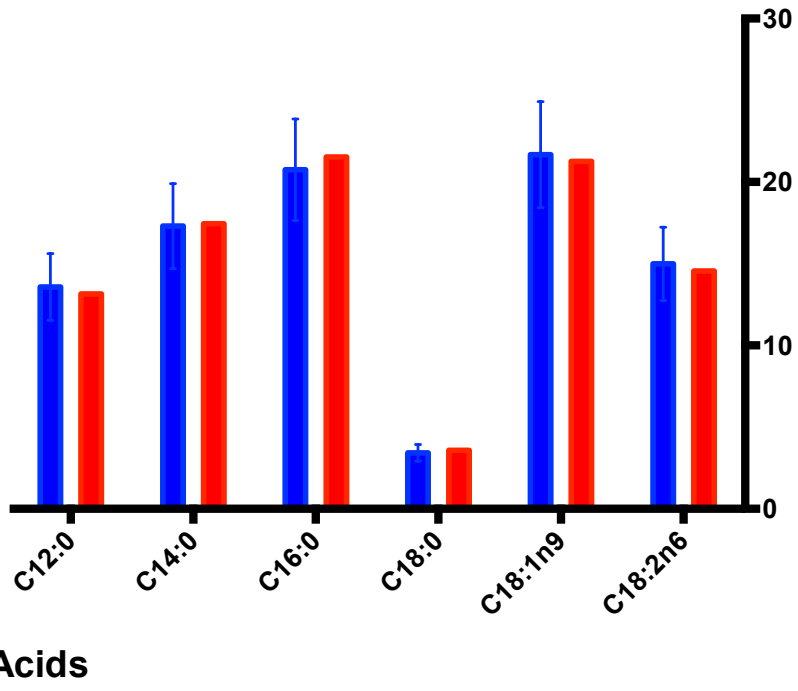

Fatty Acids
