# Supplementary material for: Analysis of breast milk fatty acid composition using dried milk samples
Source: Springer Nature journal article supplement (doi:10.1186/s13006-016-0060-2), 2016-01-25
Supplement: MOESM2 [file 9772586]

A

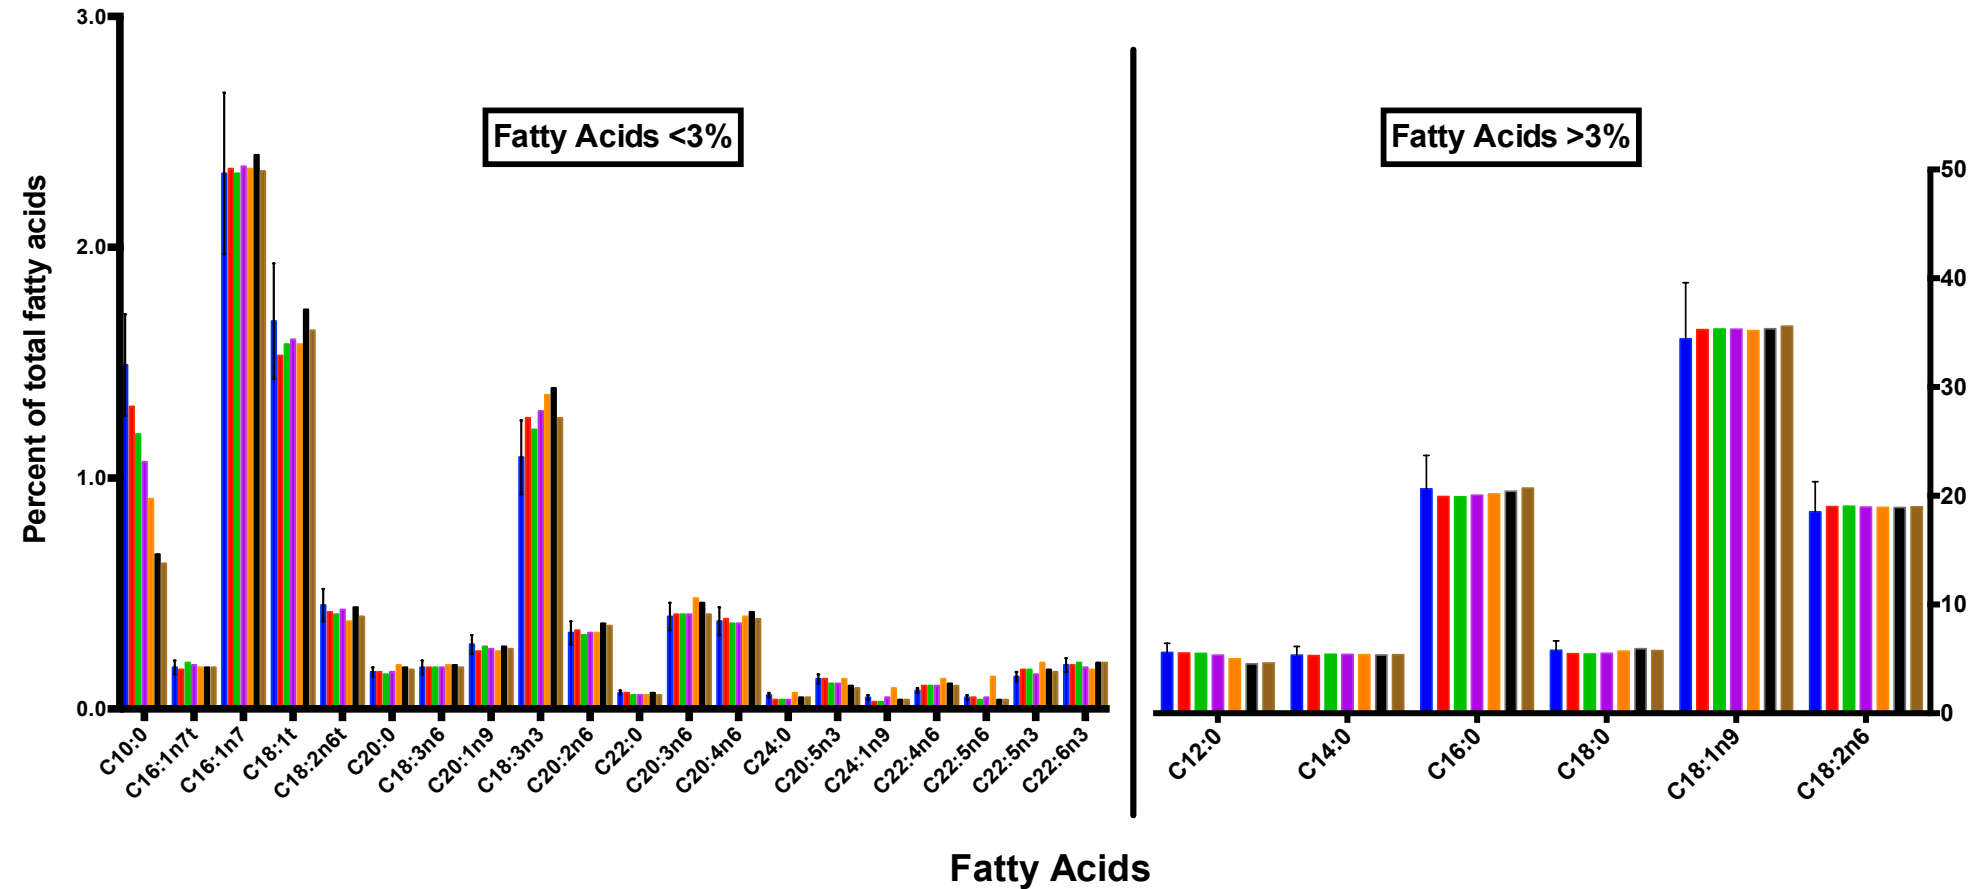

Baseline Day 1 Day 4 Week 1 Week 2 Week 3 Week 4
