# Supplementary material for: Analysis of breast milk fatty acid composition using dried milk samples
Source: Springer Nature journal article supplement (doi:10.1186/s13006-016-0060-2), 2016-01-25
Supplement: MOESM5 [file 9772586]

**D****Fatty Acids <3%****Fatty Acids >3%**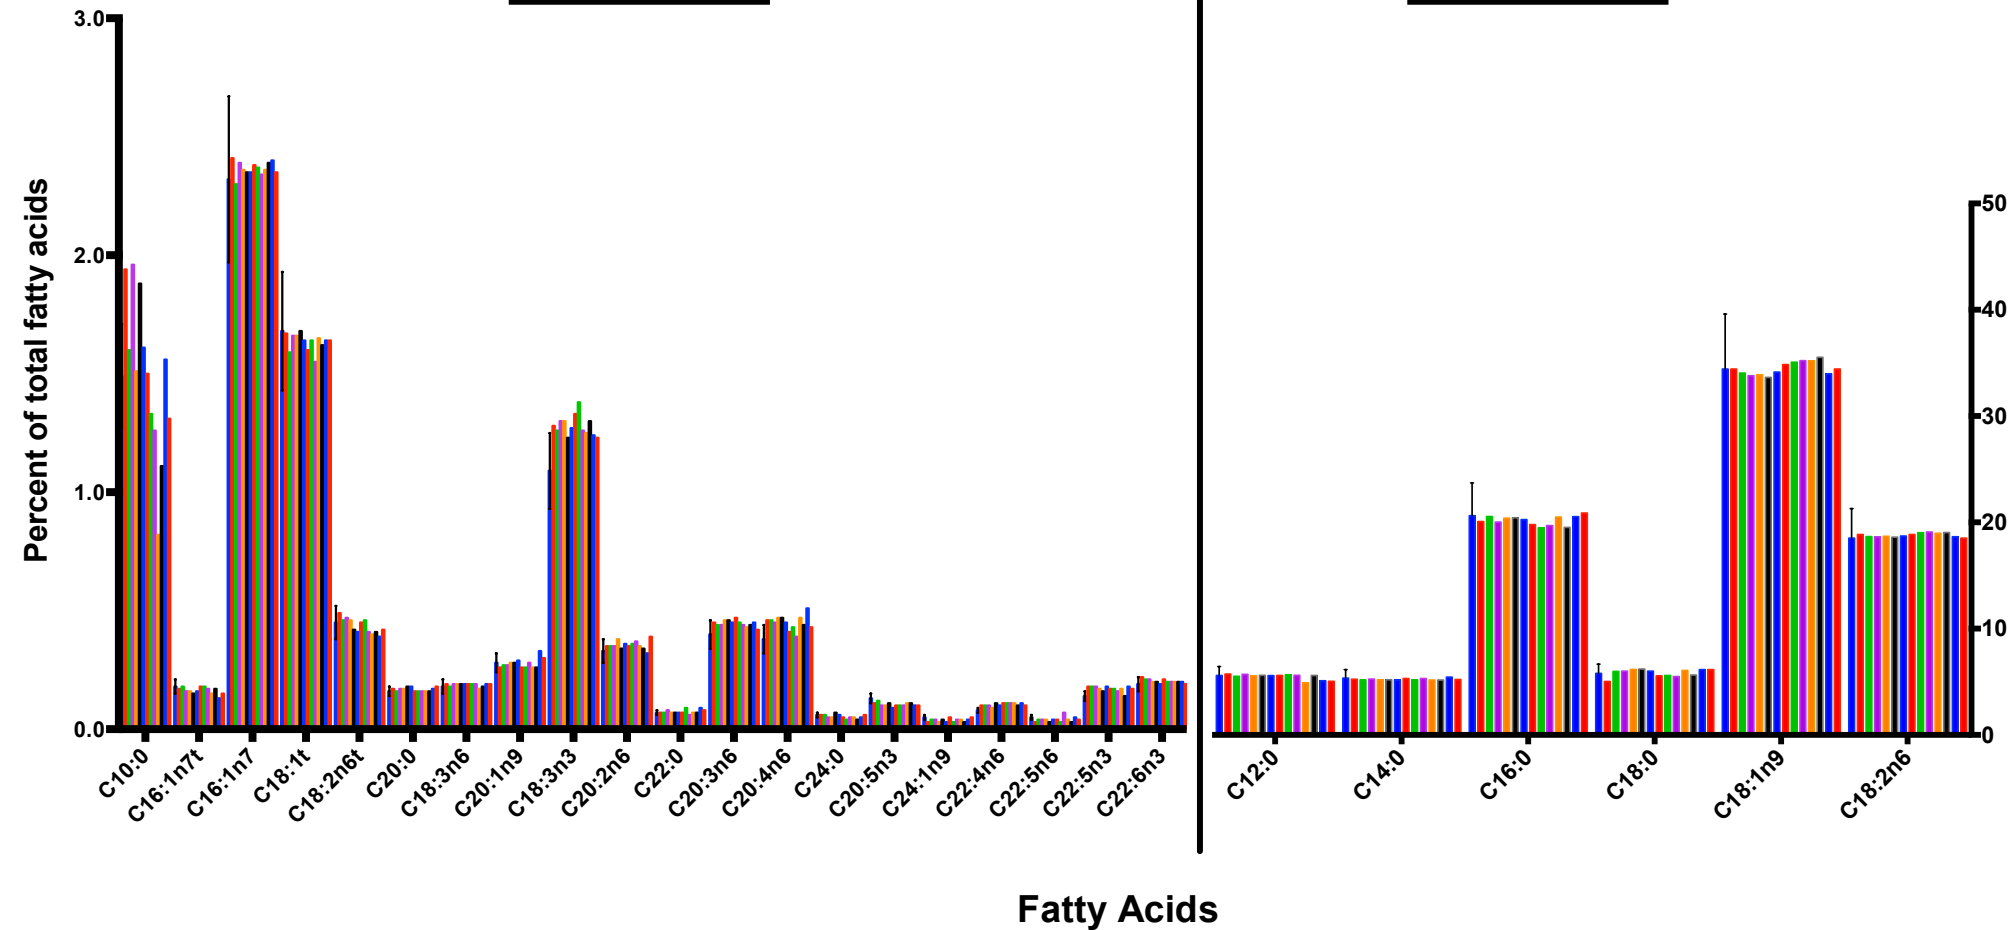

■ Baseline 
 ■ 4 days 
 ■ 1 week 
 ■ 2 weeks 
 ■ 3 weeks 
 ■ 4 weeks 
 ■ 3 months 
 ■ 6 months 
 ■ 9 months  
■ 1 year 
 ■ 1.5 years 
 ■ 2 years 
 ■ 2.5 years 
 ■ 3 years
